# Supplementary figures and images for: Chlorogenic Acid Alleviates LPS-Induced Inflammation and Oxidative Stress by Modulating CD36/AMPK/PGC-1α in RAW264.7 Macrophages
Source: MDPI journal article supplement (doi:10.3390/ijms241713516), 2023-08-31

**A**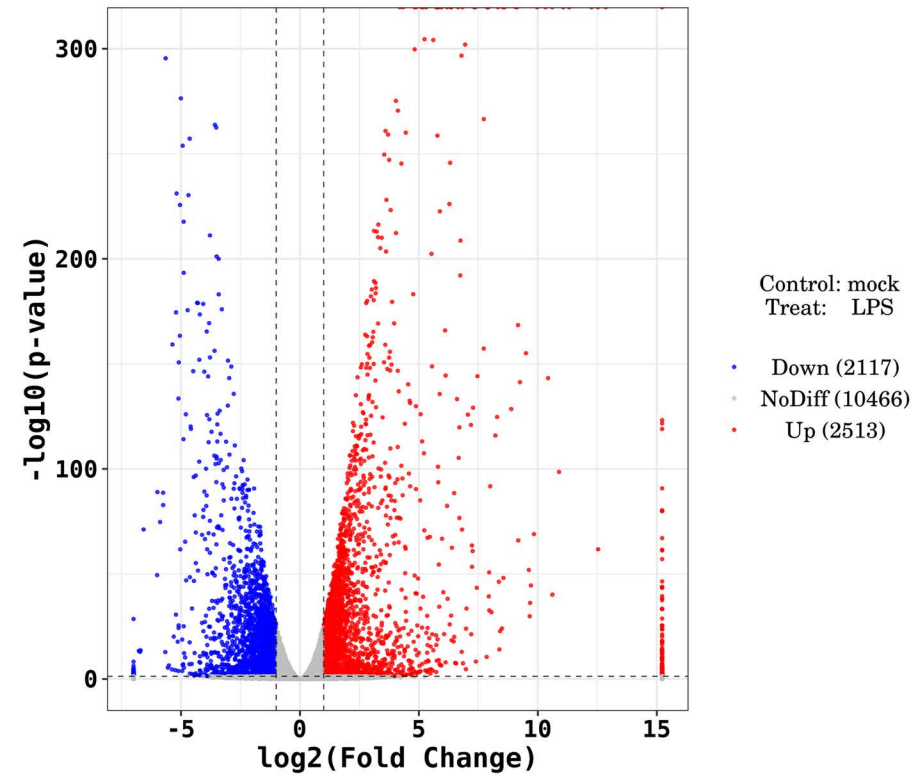**B**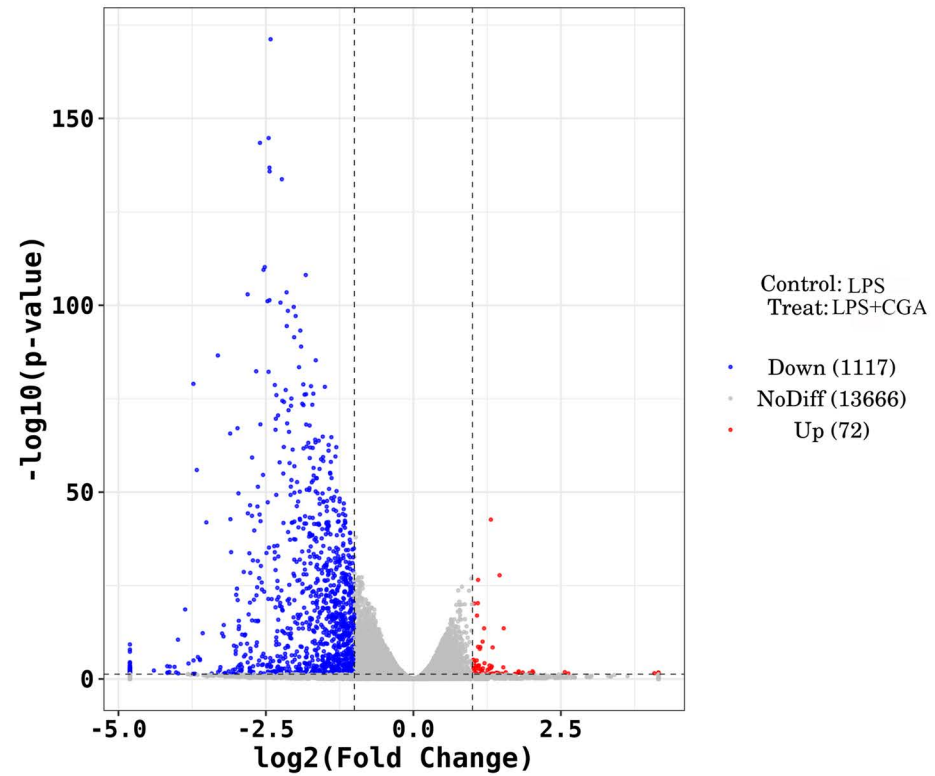

Supplement: s1 [file s1]
